# Supplementary material for: IGF2 and IGF1R identified as novel tip cell genes in primary microvascular endothelial cell monolayers
Source: Springer Nature journal article supplement (doi:10.1007/s10456-018-9627-4), 2018-06-27
Supplement: MOESM3 [file 15888746]

**Supplementary Table 1. Primer and morpholino sequences used in this study.**

Gene nomenclature, GenBank accession code, sequences of forward (Fw) and reverse (Rv) primers, size in base pairs (bp) and melting temperature (Tm) of the amplified product are indicated for each gene. For zebrafish experiments morpholino sequences are indicated. For each isoform (IGF2a and IGF2b) two probes were used, adapted from reference 15 and 23 for probe 1 and 2, respectively.

**PCR primers:**

| Gene   | GenBank      | Fw                         | Rv                       | bp  | Tm |
|--------|--------------|----------------------------|--------------------------|-----|----|
| IGF2   | NM_000612    | CCTCGTGCTGCATTGCTGCT       | CTTGCGGGCCTGCTGAAGTAGAA  | 115 | 86 |
| IGF1R  | NM_000875    | GGAGCCCTGTGGTTGGATGTATG    | TCATCTGGAAACGTCCGGTCGT   | 108 | 81 |
| ANGPT2 | NM_001147    | GCAAAATAAGCAGCATCAGCCAAC   | GCATCAAACCACCAGCCTCCT    | 115 | 76 |
| TIE1   | NM_005424    | TGCAGCCCTCTGACAAGGACGA     | CCTTCATCTTGCCCCACTG      | 112 | 83 |
| APLN   | NM_017413    | CCAGATGACAACCAGACGGACAG    | GGCACCATTCCACAAAAGATG    | 90  | 83 |
| CD34   | NM_001025109 | GCCAGGTATTACAACCTGGGTGTCCT | TCTGGTTGTCACAGAGCCTTTGT  | 165 | 82 |
| CXCR4  | NM_003467    | AACGGGGGACAGTGCCTGAA       | TGAGCCCATTCTCCAGGTCAT    | 109 | 78 |
| DLL4   | NM_019074    | AACGGGGGACAGTGCCTGAA       | TGAGCCCATTCTCCAGGTCAT    | 151 | 86 |
| EFNB2  | NM_004093    | GTTGGACAAGATGCAAGTTCTGCT   | GCTGTTGCCGTCTGTGCTAGAA   | 147 | 80 |
| NRP1   | NM_003873    | GCCTGCAACTGGGAACTGG        | CCTTGGTTGGATGATGTGATCTGG | 138 | 78 |
| NRP2   | NM_003872    | GGAGCCCTGTGGTTGGATGTATG    | TCATCTGGAAACGTCCGGTCGT   | 93  | 83 |
| PDGFB  | NM_002608    | TCCAGGTGAGAAAGATCGAGATTG   | CGTTTTGGCTCGCTGCTCCT     | 158 | 86 |
| PLXND1 | NM_015103    | GACCCCGACCCCTACACATCT      | CCTGCGCGATGACTGAAAGG     | 139 | 83 |
| ROBO4  | NM_019055    | GCGTCTTCATAGATGCCTCATCAC   | TGGCTGACCTCCATGTCTTCCAAC | 121 | 85 |
| UNC5B  | NM_170744    | CAGCCTAGATGCCCCAACTCA      | TCCCAGAGGTCCAGGATCACAC   | 129 | 83 |
| VEGFR2 | NM_002253    | CCAGATGACAACCAGACGGACAG    | GGCACCATTCCACAAAAGATG    | 104 | 77 |
| VEGFR3 | NM_002020    | GCCAGGTATTACAACCTGGGTGTCCT | TCTGGTTGTCACAGAGCCTTTGT  | 136 | 83 |

**Morpholinos:**

| Gene          | GenBank      | Probe 1                   | Probe 2                   |
|---------------|--------------|---------------------------|---------------------------|
| IGF2a         | NM_131433    | CACAGAATACATGGTAATCATCCAT | GTTTGTGGAAAGCGACGTTTACTTT |
| IGF2b         | NM_001001815 | AATGATGTTTTAGTTGGTCCTCCAT | TAGTGAAGGTCGGATTAAGTCCCCT |
| IGF2a control |              | CAGAGAATAGATCGTAATGATCGAT |                           |
| IGF2b control |              | AATGATCTTTTACTTGCTGCTCGAT |                           |
| P53 control   |              | CCTCTTACCTCAGTTACAATTTATA |                           |
